# Supplementary material for: The ENZIAN score as a preoperative MRI-based classification instrument for deep infiltrating endometriosis
Source: Springer Nature journal article supplement (doi:10.1007/s00404-019-05157-1), 2019-04-12
Supplement: MOESM1 [file 16652564]

**Supplementary material A1**

Article:

The ENZIAN score as a preoperative MRI-based classification instrument for deep infiltrating endometriosis

Authors:

Laurin Burla, David Scheiner, Eleftherios Pierre Samartzis, Stefan Seidel, Markus Eberhard, Daniel Fink, Andreas Boss, Patrick Imesch

Journal:

Archives of Gynecology and Obstetrics

Corresponding Author:

Laurin Burla, Department of Gynecology, University Hospital Zurich, Zurich, Switzerland, E-mail: laurinburla@hotmail.com

| OP A | 0 | MRI A  1 | 2 | 3 | Total |
| --- | --- | --- | --- | --- | --- |
| 0 | 22 | 0 | 1 | 0 | 23 |
| 1 | 2 | 5 | 0 | 0 | 7 |
| 2 | 0 | 5 | 22 | 0 | 27 |
| 3 | 0 | 0 | 4 | 4 | 8 |
|  |  |  |  |  |  |
| Total | 24 | 10 | 27 | 4 | 65 |
| Kendall's tau-b A |  |  | 0.8625 |  |  |

**A1 Table** Evaluation of the association of preoperative MRI findings with the intraoperative surgical findings as reference in compartment A regarding the subsizing, by means of Kendall’s tau-B.(MRI A: preoperative MRI findings in compartment A; OP A: intraoperative findings in compartment A as reference. Divided into categories 1-3 (subsizing) respectively)
